# Supplementary material for: OsMSR3, a Small Heat Shock Protein, Confers Enhanced Tolerance to Copper Stress in Arabidopsis thaliana
Source: PubMed Central journal article supplement (PMC6929131; doi:10.3390/ijms20236096), 2019-12-03
Supplement: ijms-20-06096-s001.pdf [file ijms-20-06096-s001.pdf]

**Table S1.** Primer sequences used for quantitative reverse transcription polymerase reaction (qRT-PCR)

| <b>Primer Name</b> | <b>Primer Sequence</b>     | <b>Orientation</b> |
|--------------------|----------------------------|--------------------|
| <i>ACTIN1-F</i>    | ACAGGTATTGTGTTGGACTCTGG    | Sense              |
| <i>ACTIN1-R</i>    | AGTAACCACGCTCCGTCAGG       | Antisense          |
| <i>OsMSR3-F</i>    | GTCAAGTCCATCCAGGTTACCG     | Sense              |
| <i>OsMSR3-R</i>    | GATCACAAACCGAAGGCTCG       | Antisense          |
| <i>β-TUBULIN-F</i> | GCTGACGTTTTCTGTATTCC       | Sense              |
| <i>β-TUBULIN-R</i> | AGGCTCTGTATTGCTGTGAT       | Antisense          |
| <i>AtCSD1-F</i>    | TGATGGAAGTCCACCTTCACA      | Sense              |
| <i>AtCSD1-R</i>    | ATGGCCTCCCTTCCGAGGT        | Antisense          |
| <i>AtCSD2-F</i>    | CCTCCTTCCTCCAATCCTC        | Sense              |
| <i>AtCSD2-R</i>    | AGCACTGCAACAGCCTTCTT       | Antisense          |
| <i>AtPOD-F</i>     | ATGACTTACTACATGATGAGCTGTCC | Sense              |
| <i>AtPOD-R</i>     | CAGTGTTGTCTTTCGTTGAATCTAG  | Antisense          |
| <i>AtRD29A-F</i>   | CAAACAGAGGAACCACCACTCAA    | Sense              |
| <i>AtRD29A-R</i>   | CTGGTGCATCGATCACTTCAGGT    | Antisense          |
| <i>AtABA1-F</i>    | CGTGCGGTTGGAGAAGATGTGAT    | Sense              |
| <i>AtABA1-R</i>    | TTCAGAATGGCTTCCTCCTCAGT    | Antisense          |
| <i>AtABI5-F</i>    | GGGAAGGAAAAGAGTAGTGGAT     | Sense              |
| <i>AtABI5-R</i>    | CCACTGTATATGCTTGTTTTCTT    | Antisense          |
